# Supplementary material for: Influence of a Crosslinker Containing an Azo Group on the Actuation Properties of a Photoactuating LCE System
Source: MDPI journal article supplement (doi:10.3390/polym8120435), 2016-12-14
Supplement: s1 [file s1]

# Supplementary Materials: Influence of a Crosslinker Containing an Azo Group on the Actuation Properties of a Photoactuating LCE System

Lukas B. Braun, Torsten G. Linder, Tristan Hessberger and Rudolf Zentel

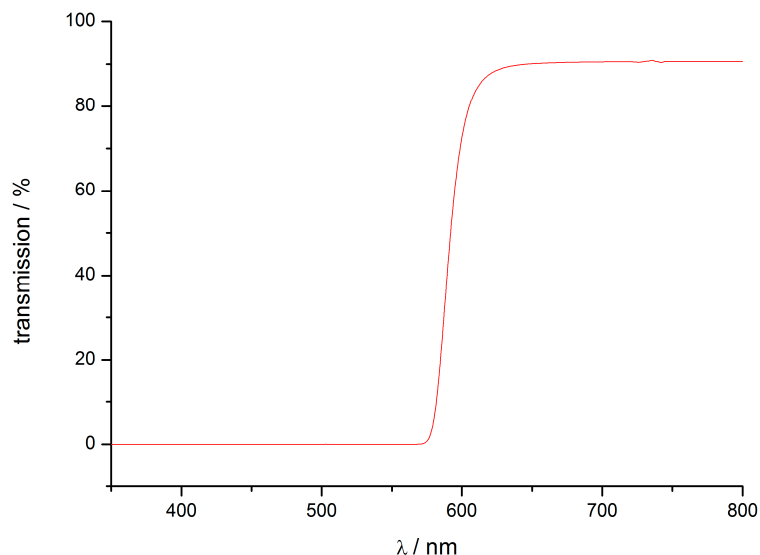

**Figure S1.** Transmission spectrum of the red-light filter OG 590 (Schott).

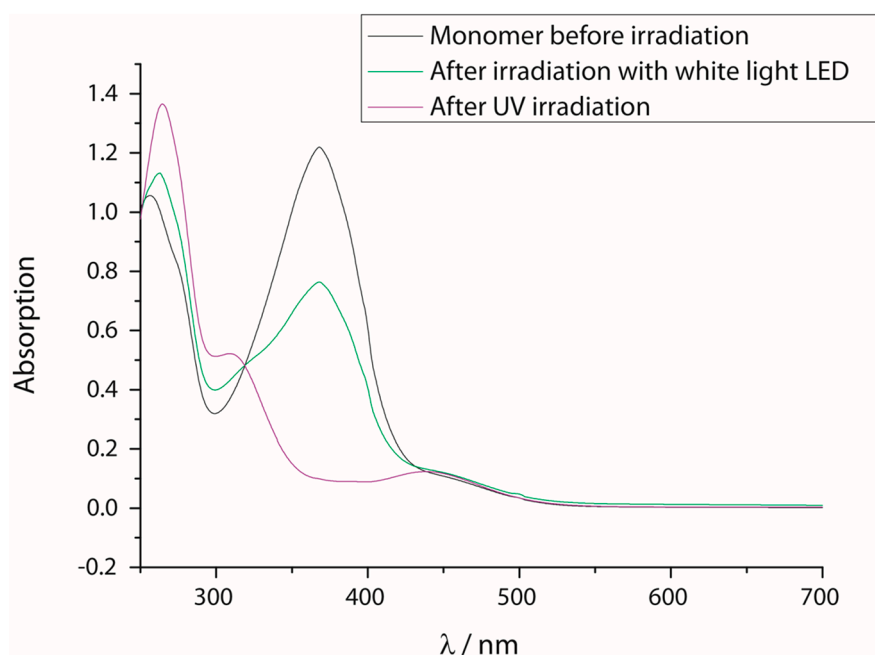

**Figure S2.** UV-vis spectra of the monomer before irradiation and after irradiation with the white light LED as well as with UV light.

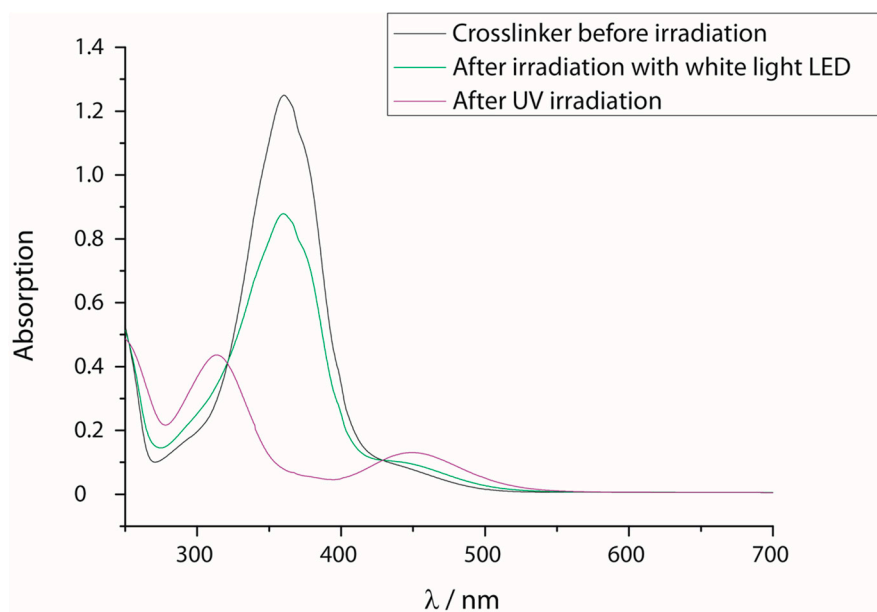

**Figure S3.** UV-vis spectra of the crosslinker before irradiation and after irradiation with the white light LED as well as with UV light.
